# Supplementary material for: Korean Guidelines for Postpolypectomy Colonoscopic Surveillance: 2022 revised edition
Source: PubMed Central journal article supplement — Intest Res. 2023 Jan 31;21(1):20–42. doi: 10.5217/ir.2022.00096 (PMC9911266; doi:10.5217/ir.2022.00096), 2023-01-31
Supplement: ir-2022-00096-Supplementary-5.pdf [file ir-2022-00096-Supplementary-5.pdf]

**Supplementary Material 5. Appraisal**

The Korean Appraisal of Guidelines for Research & Evaluation (K-AGREE) was used as the appraisal instrument. The form of K-AGREE is as follows:

1. K-AGREE

|                                   |                                                                                                             | ←Strongly Disagree                                                                                                                                                                                                                   |   |   |   |   | Strongly Agree→ |   |    |
|-----------------------------------|-------------------------------------------------------------------------------------------------------------|--------------------------------------------------------------------------------------------------------------------------------------------------------------------------------------------------------------------------------------|---|---|---|---|-----------------|---|----|
|                                   |                                                                                                             | 1                                                                                                                                                                                                                                    | 2 | 3 | 4 | 5 | 6               | 7 | NA |
| Domain 1. Scope and Purpose       |                                                                                                             |                                                                                                                                                                                                                                      |   |   |   |   |                 |   |    |
| 1                                 | The overall objective(s) of the guideline is (are) specifically described.                                  |                                                                                                                                                                                                                                      |   |   |   |   |                 |   |    |
| 2                                 | The health (clinical) question(s) covered by the guideline is (are) specifically described.                 |                                                                                                                                                                                                                                      |   |   |   |   |                 |   |    |
| 3                                 | The population (patients, public, etc.) to whom the guideline is meant to apply are specifically described. |                                                                                                                                                                                                                                      |   |   |   |   |                 |   |    |
| Domain 2. Stakeholder Involvement |                                                                                                             |                                                                                                                                                                                                                                      |   |   |   |   |                 |   |    |
| 4                                 | The guideline development group includes individuals from all the relevant professional groups.             |                                                                                                                                                                                                                                      |   |   |   |   |                 |   |    |
| 5                                 | The views and preferences of the target population (patients, public, etc.) have been sought.               |                                                                                                                                                                                                                                      |   |   |   |   |                 |   |    |
| 6                                 | The target users of the guideline are clearly defined.                                                      |                                                                                                                                                                                                                                      |   |   |   |   |                 |   |    |
| Domain 3. Rigor of Development    |                                                                                                             |                                                                                                                                                                                                                                      |   |   |   |   |                 |   |    |
| 7                                 | Systematic methods were used to search for evidence.                                                        |                                                                                                                                                                                                                                      |   |   |   |   |                 |   |    |
| 8                                 | The criteria for selecting the evidence are clearly described.                                              |                                                                                                                                                                                                                                      |   |   |   |   |                 |   |    |
| 9                                 | The overall objective(s) of the guideline is (are) specifically described.                                  |                                                                                                                                                                                                                                      |   |   |   |   |                 |   |    |
| 10                                | The health (clinical) question(s) covered by the guideline is (are) specifically described.                 |                                                                                                                                                                                                                                      |   |   |   |   |                 |   |    |
| 11                                | The population (patients, public, etc.) to whom the guideline is meant to apply is specifically described.  |                                                                                                                                                                                                                                      |   |   |   |   |                 |   |    |
| 12                                | The overall objective(s) of the guideline is (are) specifically described.                                  |                                                                                                                                                                                                                                      |   |   |   |   |                 |   |    |
| 13                                | The health (clinical) question(s) covered by the guideline is (are) specifically described.                 |                                                                                                                                                                                                                                      |   |   |   |   |                 |   |    |
| 14                                | The population (patients, public, etc.) to whom the guideline is meant to apply is specifically described.  |                                                                                                                                                                                                                                      |   |   |   |   |                 |   |    |
| Domain 4. Clarity of Presentation |                                                                                                             |                                                                                                                                                                                                                                      |   |   |   |   |                 |   |    |
|                                   | The recommendations are specific and unambiguous.                                                           |                                                                                                                                                                                                                                      |   |   |   |   |                 |   |    |
|                                   | The different options for management of the condition or health issue are clearly presented.                |                                                                                                                                                                                                                                      |   |   |   |   |                 |   |    |
|                                   | Key recommendations are easily identifiable.                                                                |                                                                                                                                                                                                                                      |   |   |   |   |                 |   |    |
| Domain 5. Applicability           |                                                                                                             |                                                                                                                                                                                                                                      |   |   |   |   |                 |   |    |
|                                   | The guideline describes facilitators and barriers to its application.                                       |                                                                                                                                                                                                                                      |   |   |   |   |                 |   |    |
|                                   | The guideline provides advice and/or tools on how the recommendations can be put into practice.             |                                                                                                                                                                                                                                      |   |   |   |   |                 |   |    |
|                                   | The potential cost implications of applying the recommendations have been considered.                       |                                                                                                                                                                                                                                      |   |   |   |   |                 |   |    |
|                                   | The guideline presents key review criteria for monitoring and/ or audit purposes.                           |                                                                                                                                                                                                                                      |   |   |   |   |                 |   |    |
| Domain 6. Editorial Independence  |                                                                                                             |                                                                                                                                                                                                                                      |   |   |   |   |                 |   |    |
|                                   | The views of the funding body have not influenced the content of the guideline.                             |                                                                                                                                                                                                                                      |   |   |   |   |                 |   |    |
|                                   | Competing interests of guideline development group members have been recorded and addressed.                |                                                                                                                                                                                                                                      |   |   |   |   |                 |   |    |
| Overall assessment                |                                                                                                             |                                                                                                                                                                                                                                      |   |   |   |   |                 |   |    |
|                                   | Overall appraisal of the guidelines                                                                         |                                                                                                                                                                                                                                      |   |   |   |   |                 |   |    |
|                                   | Competing interests of guideline development group members have been recorded and addressed.                | <input type="checkbox"/> The use of the guideline is recommended<br><input type="checkbox"/> The use of the guideline is recommended (modification required)<br><input type="checkbox"/> The use of the guideline is not recommended |   |   |   |   |                 |   |    |

## 2. Results of appraisal

### □ First appraisal

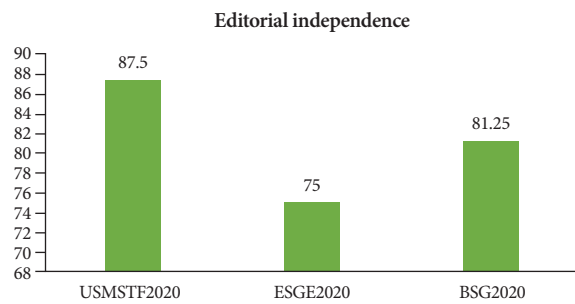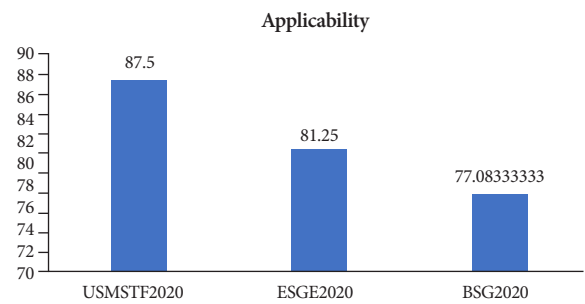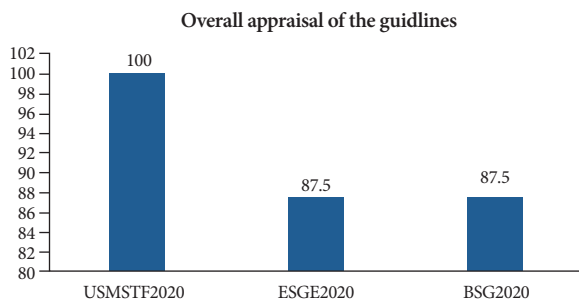

### □ Second appraisal

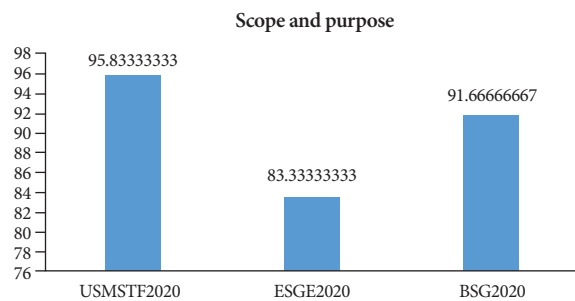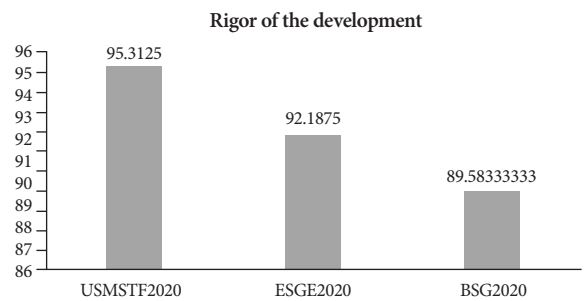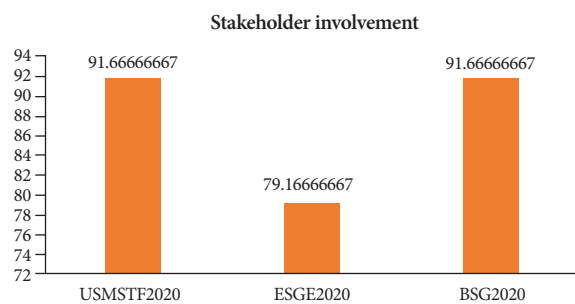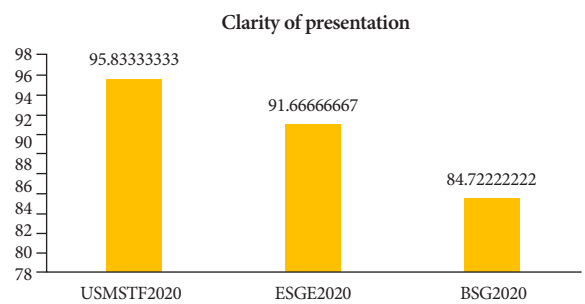

### 3. Final selection of guidelines

After appraisal, all three guidelines were finally selected. The finally selected guidelines were as follows:

- 2020 Recommendations for Follow-Up After Colonoscopy and Polypectomy: A Consensus Update by the US Multi-Society Task Force on Colorectal Cancer (US).
- 2020 British Society of Gastroenterology/Association of Coloproctology of Great Britain and Ireland/Public Health England post-polypectomy and post-colorectal cancer resection surveillance guidelines (BSG-ACGBI)
- 2020 Post-polypectomy colonoscopy surveillance: European Society of Gastrointestinal Endoscopy (ESGE) Guideline - Update 2020 (EU)
